1 **Three-dimensional organization of transzonal projections and other**  
2 **cytoplasmic extensions in mouse ovarian follicles**

3  
4 **Valentina Baena<sup>1</sup> and Mark Terasaki<sup>1\*</sup>**

5  
6 <sup>1</sup>Department of Cell Biology, UConn Health, Farmington CT USA.

7  
8 \*Corresponding author: Mark Terasaki (terasaki@uchc.edu)

9  
10  
11  
12  
13  
14  
15  
16 **Abstract**

17 Each mammalian oocyte is nurtured by its own multi-cellular structure, the  
18 ovarian follicle. We used new methods for serial section electron microscopy to examine  
19 entire cells and their projections in mouse antral ovarian follicles. It is already known that  
20 cumulus cells send towards the oocyte thin cytoplasmic projections called transzonal  
21 projections (TZPs), which are crucial for normal oocyte development. We found that  
22 most TZPs do not reach the oocyte, and that they often branch and make gap junctions  
23 with each other. Furthermore, the connected TZPs are usually contacted on their shaft  
24 by oocyte microvilli. Mural granulosa cells were found to possess randomly oriented  
25 cytoplasmic projections that are strikingly similar to free-ended TZPs. We propose that  
26 granulosa cells use cytoplasmic projections to search for the oocyte, and cumulus cell  
27 differentiation results from a contact-mediated paracrine interaction with the oocyte.

## 51 **Introduction**

52 The mammalian ovarian follicle is a complex tissue structure that nurtures the  
53 growth of the oocyte and also serves as the endocrine organ which supplies the female  
54 hormones estrogen and progesterone (Hawkins and Matzuk, 2008). In the large antral  
55 stage, a basal lamina encloses about 1000 granulosa cells, which form multiple layers  
56 around the oocyte. The 2-3 layers of cells adjacent to the oocyte are known as cumulus  
57 cells (or cumulus granulosa cells), while the cells in the outer layers of the follicle are  
58 known as mural granulosa cells.

59 The follicle begins development as a small oocyte surrounded by a single layer of  
60 thin somatic cells (“primordial follicle”) and grows to full size over the course of 3-4  
61 estrus cycles (each cycle is ~4 days) (Hirshfield, 1991). Follicle development involves  
62 multiple paracrine interactions (Edson et al., 2009; Richards and Pangas, 2010). For  
63 instance, growth-differentiation factor-9 (GDF9) is synthesized by the oocyte and is  
64 required for the follicle to develop past the single layer stage (Dong et al., 1996).

65 Early follicle growth is autonomous but later, the follicle becomes responsive to  
66 follicle stimulating hormone (FSH) from the pituitary. This hormone stimulates the  
67 differentiation of cumulus cells and outer mural granulosa cells, as well as the final  
68 stages of growth. The mural granulosa cells synthesize estrogen, and the hypothalamus  
69 monitors the number of mural granulosa cells by sensing the estrogen present in the  
70 blood. When this reaches a threshold level, the hypothalamus signals to the pituitary to  
71 release a pulse of luteinizing hormone (LH) (Knobil, 1974). LH acts on the follicle to start  
72 the ovulation process: the mural granulosa cells are reprogrammed to synthesize  
73 progesterone, the oocyte resumes meiosis, and the cumulus cells reorganize (cumulus  
74 expansion) to be expelled from the follicle along with the oocyte.

75 Gap junctions connect all cells in the follicle and have a critical role in follicle  
76 development and function (Simon et al., 1997). Gap junctions transmit nutrients taken up  
77 by the granulosa cells to the oocyte (Sugiura et al. 2005). Furthermore, they transmit the  
78 LH signal throughout the follicle. The LH receptors are present only on the outer mural  
79 granulosa cells (Bortolussi et al., 1979). LH binding causes a reduction of cGMP in these  
80 cells, which in turn lowers the cGMP levels in other granulosa cells and in the oocyte by  
81 diffusing through the gap junctions (Shuhaibar et al., 2015). Elevated cGMP levels in the  
82 oocyte maintain it arrested in meiotic prophase, and the reduction of cGMP caused by  
83 LH reinitiates meiosis in preparation for fertilization (Norris et al., 2009). A parallel  
84 pathway involving EGF also lowers cGMP (Liu et al., 2014).

85 The gap junctions between cumulus cells and the oocyte are present on  
86 remarkable structures called transzonal projections (TZPs) (Li and Albertini, 2013;  
87 Clarke, 2018). These are thin cytoplasmic projections that originate from the cumulus  
88 cells and traverse the 3-5 micron-thick extracellular matrix of the oocyte (zona pellucida).  
89 They contact the oocyte surface at adherens junctions (Mora et al., 2012) and gap  
90 junctions (Gilula et al., 1978). Because TZPs provide the site of gap junctional  
91 communication and possibly of other interactions between the oocyte and cumulus cells,  
92 they are crucial structural elements of the follicle. However, due to their density and  
93 complexity, the three-dimensional organization of oocyte components, TZPs, and their  
94 junctions is poorly understood.

95 Automation and new computer capabilities have improved serial section electron  
96 microscopy so that it is much more feasible to produce large, three-dimensional fields of  
97 view at high resolution (Denk and Horstmann, 2004). We used the ATUM (automated  
98 tape-collecting ultramicrotome) method with scanning electron microscopy (SEM)

99 (Kasthuri et al., 2015) to examine entire cells and their relationships to neighboring cells  
100 in mouse antral ovarian follicles. The images provide new information on follicle  
101 structure, particularly the inter-relationships of the TZPs and the oocyte cell surface.  
102 They also reveal the presence of cytoplasmic projections among granulosa cells within  
103 the follicle. As in other tissues and systems, these projections may be essential for cell  
104 communication during normal development and function (Ramirez-Weber and Kornberg,  
105 1999; Inaba et al., 2015; Heimsath et al., 2017).

106

## 107 **Results**

108

### 109 **Cumulus cells extend connected and free-ended transzonal projections (TZPs).**

110

111 The observations to be described below were obtained from antral follicles from  
112 prepubertal mice without exogenous hormonal stimulation. At this stage, the oocyte is  
113 surrounded by a several micron-thick extracellular matrix, the zona pellucida. Cumulus  
114 cells on the other side of the zona pellucida contact the oocyte by sending cytoplasmic  
115 projections through the zona pellucida (TZPs) (Figure 1A).

115

116 To visualize TZPs in three dimensions, we collected ~600 serial sections of 40-  
117 45 nm thickness (total depth 27  $\mu\text{m}$ ) and imaged volumes of ~43 x 43  $\mu\text{m}$  (x, y) at a 3.5-  
118 5 nm per pixel resolution. The imaged volumes were centered to contain the zona  
119 pellucida, oocyte surface, and cumulus cell bodies (Figure 1B). We were able to trace  
120 every TZP sent by individual cells (Video 1 and Figure 1C), and record their interactions  
121 with other TZPs and with the oocyte surface (described below). As can be seen in video  
122 2, TZPs arise from cumulus cells located at varying distances from the oocyte.

122

123 We found that the majority of TZPs do not reach the surface of the oocyte (Figure  
124 2A, C, D). On average, each cumulus cell had  $31 \pm 5$  ( $n = 8$ ) TZPs that do not reach the  
125 surface of the oocyte, and  $9 \pm 2$  ( $n = 8$ ) TZPs that reach the oocyte and make a junction  
126 with it (Figure 2B, C, D) (data shown as mean  $\pm$  standard error of the mean, unless  
127 specified otherwise). We will refer to these as free-ended and connected TZPs,  
128 respectively.

128

129 We measured the lengths of connected and free-ended TZPs in serial electron  
130 micrographs (Figure 2E). The lengths of connected TZPs had a bell curve-type  
131 distribution with an average length of  $7.9 \pm 1.9 \mu\text{m}$  ( $n = 70$ ) (mean  $\pm$  standard deviation).  
132 Free-ended TZPs had a different kind of distribution, in which the number of projections  
133 decreased with length. The first, second, and third quartiles were 1.1, 2.2, and 4.1  $\mu\text{m}$ ,  
134 respectively. In other words, 25% of the projections were shorter than 1.1  $\mu\text{m}$ , the  
135 median (50%) was 2.2  $\mu\text{m}$ , and 25% of the projections were longer than 4.1  $\mu\text{m}$ . The  
136 shortest and longest lengths were 0.2  $\mu\text{m}$  and 11.4  $\mu\text{m}$  (see Figure 8C).

136

137 Connected TZPs were significantly longer than the average thickness of the zona  
138 pellucida, which was  $4.1 \pm 0.3 \mu\text{m}$  ( $n = 3$ ). The thickness of the zona pellucida was  
139 measured between the cumulus cell boundary and the oocyte surface at five locations in  
140 sections containing the widest diameter of the oocyte. Connected TZPs often extended  
141 along the surface of the oocyte making long junctions with it, thereby increasing their  
142 average length. Unexpectedly, some connected TZPs looped back to the zona pellucida  
143 after making a long junction with the oocyte surface (Video 3). Additionally, many free-  
144 ended TZPs were longer than the thickness of the zona pellucida (Figure 2E), but these  
145 did not reach the oocyte surface because they traveled obliquely through the zona  
146 pellucida (Figure 2C).

146 Connected TZPs were slightly thicker than free-ended TZPs ( $75 \pm 2$  nm ( $n = 28$ ),  
147 and  $68 \pm 2$  nm ( $n = 30$ ), respectively), and organelles were more often seen in  
148 connected TZPs rather than free-ended TZPs. During our analysis, we encountered two  
149 cumulus cells in the process of mitosis in two of the follicles analyzed. One cell was in  
150 prophase and one in prometaphase. Interestingly, both mitotic cumulus cells had free-  
151 ended and connected TZPs (Supplementary Figure 1), suggesting that cumulus cells  
152 maintain their connection with the oocyte during mitosis.

153

#### 154 **TZPs often contact each other and make gap junctions.**

155 Our data revealed novel characteristics of TZPs throughout the zona pellucida.  
156 For instance, we found that  $\sim 12\%$  of the TZPs analyzed branched into one or more  
157 projections (Supplementary Figure 2, and see Figure 3B). Our data also revealed  
158 numerous examples of side-to-side and end-to-end contacts between TZPs (Video 4  
159 and Figure 3A). Video 4 shows three examples of TZP contact sites, all found within just  
160 21 sections (a thickness of  $\sim 1$   $\mu\text{m}$ ), providing an example of how common these  
161 interactions are within the zona pellucida. Individual contacts like these would be difficult  
162 to resolve by light microscopy. TZP-TZP contacts were small, spanning through 1-4 40  
163 nm sections. Most occurred in the upper half of the zona pellucida, closer to the cumulus  
164 cells than to the oocyte. We traced interacting TZPs back to their cell of origin to  
165 determine if they were derived from different cells (Figure 3B). From 82 TZP-TZP  
166 contacts analyzed, 78% were between TZPs from different cells and 22% were between  
167 TZPs from the same cell. The presence of same cell TZP-TZP contacts suggests that  
168 TZPs form contacts indiscriminately, in other words, two TZPs about to make a contact  
169 are not restricted whether they are derived from the same cell or from two different cells.

170 Gap junctions within the zona pellucida have previously been observed by  
171 immunofluorescence (Simon et al., 2006). However, due to the limited resolution of SEM  
172 ( $\sim 3$  nm for these studies), it was not possible to identify small gap junctions in our data.  
173 To investigate if the TZP-TZP contacts consisted of gap junctions, we collected sections  
174 from the same follicles that had been previously analyzed, and used transmission  
175 electron microscopy (TEM) to image the zona pellucidae. We found that most, but not  
176 all, contacts in the upper half of the zona pellucida were gap junctions (Figure 3C).  
177 Supporting the idea that TZPs can form gap junctions at their endings, we found that  
178 some TZPs (18 of 325) ended in an invaginated annular junction within a cumulus cell  
179 body (Supplementary Figure 3). Based on our previous immunogold studies (Norris et  
180 al., 2017), these are likely to be invaginated gap junctions.

181

#### 182 **Connected TZPs and oocyte microvilli make contacts with each other.**

183 As described previously (Li and Albertini, 2013; Motta et al., 1994), TZPs end in  
184 junctions at the oocyte surface that contain adherens junctions, as identified by an  
185 electron-dense deposit (Figure 4A, B) (Niessen and Gottardi, 2008). We reconstructed  
186 12 of these junctions and found that they range from 0.39  $\mu\text{m}$  to 3.59  $\mu\text{m}$  in length, and  
187 that most lie along the oocyte surface (Figure 4C), while a few form invaginations into  
188 the oocyte cytoplasm.

189 Mammalian oocytes have a dense network of microvilli on their surface (Runge  
190 et al., 2007). In our analysis, oocyte microvilli were generally uniformly distributed along  
191 the oocyte surface, and were  $1.06 \pm 0.09$   $\mu\text{m}$  ( $n = 45$ ) long. Interestingly, we often  
192 noticed areas in the zona pellucida where microvilli appeared “clumped” (Figure 4D).  
193 Serial section analysis revealed that these clumped areas consisted of one or two TZPs  
194 connected to the oocyte, which were closely associated with 3-6 oocyte microvilli (Figure

195 4E and Video 5). Video 5 shows an example of a connected TZP that is almost  
196 continuously coupled with a long microvillus and then becomes surrounded by 5-6 short  
197 microvilli as it gets close to the oocyte surface. In some cases, microvilli were seen  
198 alongside the TZP for a distance of up to 6  $\mu\text{m}$  (Figure 4F). Although most TZPs that  
199 reached the oocyte surface were contacted by microvilli in this manner, some were not.  
200 Only one example of a microvillus contacting a free-ended TZP was seen.

201 To test whether TZP-microvilli contacts were gap junctions, we inspected thin  
202 sections by TEM as described in the previous section. The oocyte cytoplasm and  
203 microvilli can usually be distinguished from TZPs by a difference in electron density (see  
204 example in Video 3) or by the presence of precipitate that often forms in the oocyte  
205 cytoplasm and microvilli, but not on TZPs (see example in Video 5). This allowed us to  
206 identify possible TZP-microvilli contacts in the TEM images. In contrast to contacts seen  
207 in the upper half of zona pellucida, these did not appear to be gap junctions (data not  
208 shown).

209

### 210 **Cytoplasmic projections are also found outside of the zona pellucida (non-TZPs).**

211 During our analysis of TZPs, we found that many cumulus cells had some  
212 projections directed away from the oocyte toward other cells, and that mural granulosa  
213 cells had similar projections. The number and directionality of the cytoplasmic  
214 projections had a striking dependence on cell location within the follicle. Projections not  
215 found in the zona pellucida will be referred to as non-TZP cytoplasmic projections.

216 Cumulus cells were identified as any cell that was connected to the oocyte by  
217 means of TZPs. As described before, these cells differed based on whether the cell body  
218 was located adjacent to the zona pellucida or displaced away from it (Figure 5A, B).  
219 Cumulus cells that were directly adjacent to the zona pellucida extended most  
220 projections toward the oocyte as TZPs, and only a few away from it (Figure 5C). These  
221 cells had an average of  $51 \pm 4$  TZPs and  $10 \pm 3$  non-TZP cytoplasmic projections ( $n = 5$ )  
222 (connected and free-ended TZPs were pooled together for these studies). Displaced  
223 cumulus cells, which were located 1-2 cell diameters away from the oocyte, had a  
224 decreased number of TZPs, and an increased number of non-TZP cytoplasmic  
225 projections. These were generally oriented toward other cells and sometimes  
226 invaginated into neighboring cell bodies (Figure 5D and Video 1). Video 1 highlights one  
227 of these cells and every cytoplasmic projection derived from it, including TZPs. These  
228 cumulus cells had  $22 \pm 9$  TZPs and  $27 \pm 3$  non-TZP cytoplasmic projections ( $n = 3$ ) (see  
229 Figure 8A). In summary, cumulus cells that are further displaced from the oocyte have  
230 fewer TZPs and more non-TZP cytoplasmic projections compared to cumulus cells  
231 adjacent to the oocyte (see Video 2).

232 To analyze the projections of mural granulosa cells, we imaged volumes of  $\sim 71 \times$   
233  $71 \times 27 \mu\text{m}$  (x, y, z) at a resolution of 5-6 nm per pixel, centered on mural granulosa cells  
234 of the follicles that were previously used to study TZPs. Cells chosen for analysis were  
235 selected if they were centrally located within the field-of-view and the cell body was  
236 completely within the volume.

237 Inner mural granulosa cells, which are not connected to the oocyte or to the  
238 basal lamina (Figure 6A), had an average of  $23 \pm 2$  projections per cell ( $n = 14$ ). These  
239 projections were oriented in many directions with no consistent bias (Figure 6B, C and  
240 Videos 6-7). Some of these projections were remarkably long (up to 13.7  $\mu\text{m}$ ) and  
241 frequently invaginated into neighboring cells. Video 6 shows several examples of such  
242 invaginations; in particular, one cell (colored in blue) showed 7 projections, all of which  
243 invaginated into its neighboring cell (located to its upper right). We have not detected

244 fused membranes between the invaginated projections and the cells into which they  
245 invaginate (See video 10 for an example of an invaginated projection).

246 Outer mural granulosa cells were identified as those that had a visible connection  
247 with the basal lamina (Figure 7A). Many outer mural granulosa cells had their cell body  
248 located 2-3 cell layers away from the basal lamina, but connected to it through a thick  
249 long cytoplasmic process (Figure 7B, D) (Lipner and Cross, 1968). Numerous thin  
250 cytoplasmic projections, similar to those found in the other cell groups, were seen  
251 originating from these elongated cells (Figure 7D and Video 8), with an average of  $28 \pm$   
252  $5$  projections per cell ( $n = 4$ ). Strikingly, outer mural granulosa cells that were located  
253 directly adjacent to the basal lamina (Figure 7A, C and Video 8) had a significant  
254 reduction in the number of projections, having  $7 \pm 1$  ( $n = 3$ ) per cell. In summary, mural  
255 granulosa cells that are not connected to the oocyte or to the basal lamina have  
256 numerous projections that are oriented randomly, while cells that are connected to the  
257 basal lamina differ based on the location of their cell body: cells that are further  
258 displaced from the basal lamina have a larger number of projections compared to cells  
259 directly adjacent to the basal lamina (Video 9 and Figure 8A).

260 We then characterized the endings of non-TZP cytoplasmic projections from  
261 cumulus, inner mural, and outer mural granulosa cells (analysis of 427 projections from  
262 20 different cells). Most projections (38%) ended on the surface of a neighboring cell.  
263 Other common ending types were inside an invagination in a neighboring cell (24%)  
264 (Video 10), or as a free end in the extracellular space (26%). Less common endings  
265 seen were as an end-to-end contact with a projection from a different cell (7%), as an  
266 invaginated annular junction (5%), or as a small linear gap junction (<1%). Examples of  
267 all these endings can be seen in videos 1, 6, and 8.

268

### 269 **Common features of projections throughout the follicle.**

270 Free-ended TZPs and the cytoplasmic projections of granulosa cells showed a  
271 similar overall appearance; both were usually devoid of organelles, and their lengths  
272 were strikingly similar. As with free-ended TZPs, we found that the number of non-TZP  
273 cytoplasmic projections from the cumulus, inner mural, and outer mural cells decreased  
274 with length (Figure 8B). The first, second, and third quartiles were 1.1, 2.5, and 4.4  $\mu\text{m}$ ,  
275 respectively (described above). The shortest and longest lengths were 0.2  $\mu\text{m}$  and 13.7  
276  $\mu\text{m}$ . Figure 8C shows a detailed summary of these findings. The length distribution and  
277 thickness of these projections, which was  $76 \pm 2$  nm ( $n = 67$ ), did not change based on  
278 their location within the follicle.

279 The striking similarity between the lengths of free-ended TZPs and non-TZP  
280 cytoplasmic projections from every cell group suggested to us that all granulosa cells are  
281 programmed to seek out the oocyte by extending cytoplasmic projections. If so, some of  
282 these projections should be longer than the thickness of the zona pellucida. Consistent  
283 with this idea, we found that at least a quarter of the projections from every somatic cell  
284 within the follicle were longer than the thickness of the zona pellucida, which was  $4.1 \pm$   
285  $0.3$   $\mu\text{m}$  ( $n = 3$ ) (as mentioned above) (Figure 8B, C). Our findings suggest that every  
286 somatic cell in the follicle is able to probe a distance that is longer than the thickness of  
287 the zona pellucida around their cell body by extending cytoplasmic projections. These  
288 projections could allow cells to contact the oocyte if the cell body is located at an  
289 appropriate distance (Figure 9).

290

## 291 **Discussion**

292

293

294 In this study, we examined mouse antral ovarian follicles by serial section  
295 electron microscopy. Using the ATUM method (Kasthuri et al., 2015), we imaged  
296 volumes large enough to examine whole cells at high resolution, along with all of their  
297 cytoplasmic projections to determine how they contact other cells in the densely  
298 organized regions of the ovarian follicle.

298

299

#### TZP connections to the oocyte

300

301 Previous studies have shown that TZPs contact the oocyte at an adherens  
302 junction in a depression in the oocyte surface (Motta et al., 1994). Small gap junctions  
303 have also been observed in the vicinity of the oocyte by freeze fracture and thin section  
304 TEM (Anderson and Albertini, 1976), and by immunofluorescence (Simon et al., 2006),  
305 but these studies did not provide enough three-dimensional information to determine to  
306 what degree gap junctions are present at the oocyte surface or on projections from the  
307 oocyte.

307

308 Our serial section data shows that the TZP lies in a depression in the oocyte  
309 surface without much widening (Figure 4C), and can make long linear adherens  
310 junctions with the oocyte surface (Video 3).

310

311 We found that most TZPs that reach the oocyte surface are contacted by several  
312 oocyte microvilli on their shaft (Figure 4D-F and Video 5). This previously undetected  
313 association is significant because there are several critical interactions between the  
314 oocyte and cumulus cells and one or more of these interactions could occur at these  
315 contact sites. We initially considered whether these were the sites of gap junctions  
316 between cumulus cells and the oocyte. We tentatively conclude that the microvilli / TZP  
317 contact sites are not gap junctions because we did not find them in this region of the  
318 zona pellucida by TEM. An interaction that may be occurring at the microvilli / TZP  
319 contact sites is discussed below.

319

320

#### Free-ended TZPs and dynamics

321

322 Although TZPs have been known for many years, their dynamics have not yet  
323 been characterized. A recent study has focused on this issue using a reconstituted  
324 system (El-Hayek et al., 2018). When cumulus cells that have been stripped from their  
325 innate oocyte are reaggregated with a donor oocyte, they make new TZPs, which form  
326 junctions with the oocyte. This clearly demonstrates that TZPs are dynamic structures.

326

327 Our serial section data is consistent with dynamic TZPs in-situ. We show for the  
328 first time that most TZPs in the zona pellucida are free-ended (Figure 2). Free-ended  
329 TZPs have a wide distribution of lengths and are oriented in many directions. We found  
330 that TZPs often make close contacts with each other, some of which were found to be  
331 gap junctions by TEM (Figure 3 and Video 4). Our observations are consistent with  
332 persistent growth and perhaps retraction of TZPs in intact follicles at a stage when the  
333 cumulus cells are already connected to the oocyte by TZPs. All TZPs contain actin but  
334 only a small minority contain microtubules (El-Hayek et al., 2018). We suggest that the  
335 free-ended TZPs contain only actin and that microtubules grow into them if they connect  
336 to the oocyte.

336

337 One question is whether the TZP dynamics is induced or constitutive. In their  
338 recent study, El-Hayek et al. (2018) present evidence that oocyte-derived factors induce  
339 the formation of TZPs. When the oocyte is removed from a granulosa-oocyte complex  
340 (GOC), the mRNA levels for general components of filopodia (*Damm1*, *Fscn1*, and  
*Myo10*) are drastically reduced in the remaining granulosa cells. Additionally, when

341 soluble GDF9 (a BMP-like family paracrine factor produced by the oocyte) was added to  
342 the GOCs medium, the mRNA levels of filopodia components were restored (there is  
343 uncertainty however regarding the physiological dose for GDF9). When GDF9  
344 production was blocked by siRNA injection into oocytes of intact GOCs, filopodia mRNA  
345 levels were reduced in granulosa cells and the number of TZPs counted was 30% lower  
346 than their controls. The authors conclude that GDF9, possibly with other oocyte-secreted  
347 factors, induces cumulus cells to extend filopodia into the zona pellucida towards the  
348 oocyte. We present an idea below that the dynamics of TZPs is largely constitutive.

349

#### 350 Cytoplasmic projections / filopodia in the follicle

351 Our serial section data allowed us for the first time to detect and characterize  
352 cytoplasmic projections in parts of the follicle that are densely populated with cells. We  
353 found that cumulus cells have some projections directed away from the oocyte (Figure 5  
354 and Video 2), and that mural granulosa cells have numerous projections extending in all  
355 directions (Figures 6-7, and Videos 7-9). There is a striking similarity in the length  
356 distributions of these projections and the free-ended TZPs (Figure 8). We did not show  
357 that these projections contain filopodia markers, but on the basis of their similarity to  
358 TZPs, which do have filopodial markers (El-Hayek et al., 2018), it seems likely that these  
359 projections are filopodia.

360

#### 361 Possible filopodial functions

362 Filopodia are frequently seen in cultured cells and are often dynamic when  
363 observed by time-lapse imaging. They have also been commonly observed in-situ such  
364 as in the sea urchin and *Xenopus* embryo blastocoel (Miller et al., 1995, Danilchik et al.,  
365 2013). There is evidence that filopodia sense environmental cues that guide migration of  
366 pathfinding neurons and of vascular endothelial tip cells forming a new capillary (Bentley  
367 and Toroian-Raymond, 1986; Fantin et al., 2015). Upon contact with axons, dendritic  
368 filopodia were observed to become dendritic spine synapses (Ziv and Smith, 1996).

369 In the ovarian follicle, filopodia could be involved in transducing paracrine or  
370 hormonal signals. These signaling molecules are usually thought to act by diffusion but  
371 there is recent evidence that paracrine factors can act by contact with specialized  
372 filopodia termed “cytonemes” (Kornberg, 2017). Evidence for signaling by contact has  
373 been found in tissues where paracrine signaling is known to occur (Ramirez-Weber and  
374 Kornberg, 1999). Receptors and ligands have been localized to filopodia (Sanders et al.,  
375 2013; Gonzalez-Mendez et al., 2017), and paracrine signaling is reduced or eliminated  
376 by eliminating the filopodia (Roy et al., 2014).

377 There is evidence for paracrine signaling by contact in the *Drosophila* male  
378 germline stem cell niche. In this system, Decapentaplegic (Dpp), a *Drosophila* BMP, is  
379 secreted by hub cells to maintain adjacent cells as germline stem cells (Kawase et al.,  
380 2004). When a germline stem cell divides, the daughter cell, which becomes displaced  
381 away from the hub cell (source of Dpp) begins to differentiate. Later work showed that  
382 the germline stem cells extend microtubule-based projections (MT-nanotubes), which  
383 invaginate into hub cells. Dpp and its receptor Thickveins (Tkv) were localized to these  
384 invaginated compartments (Inaba et al., 2015). Thus, the Dpp / Tkv interaction occurs  
385 where two cells make a close contact.

386 We attempt here to provide an explanation for our observations of filopodia in  
387 granulosa cells and the TZPs in cumulus cells. In the follicle, it is thought that the inner  
388 mural granulosa cell is the default state and that GDF9 induces the cumulus cell-specific  
389 phenotype. Cultured granulosa cells from dissociated follicles are induced to synthesize



390 cumulus cell markers by addition of soluble GDF9 (Elvin et al, 1999) and a partial  
391 knockdown of GDF9 causes diminished expression of cumulus cell markers (Su et al.,  
392 2004).

393 It is assumed that GDF9 diffuses from the oocyte across the zona pellucida and  
394 induces adjacent cells to become cumulus cells. We propose instead that the GDF9  
395 interactions occur when a filopodia contacts the oocyte. In this idea, granulosa cells use  
396 filopodia to search whether they are close to the oocyte. If they contact the oocyte, they  
397 become a cumulus cell, and the contacting filopodia convert into a connected TZP.  
398 Conversely, if a granulosa cell is in contact with the basal lamina, it becomes an outer  
399 mural granulosa cell (Figure 9).

400 Our proposal accounts for the presence of filopodia throughout the follicle as well  
401 as their similar length distributions, in which ~25% are long enough to traverse the zona  
402 pellucida (Figure 8C). The main prediction is that receptors for GDF9 are present on the  
403 filopodia. In particular, these receptors should be present at sites of contact of oocyte  
404 and TZPs, for instance, at the microvilli / TZP contact sites. Receptors for GDF9 have  
405 been localized but at a resolution too low to address this issue (Sun et al., 2010). New  
406 methods for immunolabeling serial sections may help to test this idea (Norris et al.,  
407 2017).

408 In summary, new methods for serial section electron microscopy enabled us to  
409 examine whole cells and their relationship to other cells with ultrastructural resolution.  
410 Our study shows that this kind of structural information may be useful in understanding  
411 the interactions that occur during development and function of a complex tissue  
412 structure. Knowledge of other tissue structures is likely to benefit from similar serial  
413 section analysis.

414  
415

## 416 **Materials and methods**

417  
418

### 418 **Animals**

419 Ovaries were obtained from prepubertal 24-day-old C57BL/6J mice (Jackson  
420 Laboratories, Bar Harbor, ME). The mice were not injected with hormones prior to  
421 euthanasia. All procedures were approved by the animal care committee at UConn  
422 Health.

423  
424

### 424 **Tissue processing for electron microscopy**

425 After dissection from the animal, ovaries were cleaned and split into 3-4 pieces  
426 with forceps. Special attention was used to attempt to preserve follicle integrity. The  
427 pieces were rinsed in 1X PBS once, and then fixed in a Karnovsky's fixative (2.5%  
428 glutaraldehyde / 2% paraformaldehyde) in 0.1 M cacodylate buffer for 3-4 hours at room  
429 temperature. Ovaries were then rinsed several times in 0.1 M cacodylate buffer and  
430 stored overnight at 4°C.

431 Ovaries were post-fixed with 4% OsO<sub>4</sub> in 3.2% potassium ferricyanide in 0.1 M  
432 cacodylate buffer for 1 hour at room temperature. They were then thoroughly rinsed with  
433 distilled water, treated with 1% aqueous uranyl acetate overnight at 4°C, and then  
434 treated with 0.066% lead aspartate for 30 minutes at 60°C. The samples were then  
435 rinsed thoroughly with distilled water, dehydrated in graded ethanol solutions, embedded  
436 in epoxy resin (Poly/bed 812 Embedding Media, Polysciences, Warrington, PA), and  
437 polymerized in a 60°C oven for 48 hours.

438

### 439 **Sectioning, imaging, and analysis**

440 Serial sections were cut from the polymerized epon blocks with a diamond knife  
441 (Ultra 45°, Diatome, Hatfield, PA) at a thickness of 40-45 nm. For each sample, 400-600  
442 serial sections were collected on tape using an automated tape-collecting  
443 ultramicrotome (Kasthuri et al., 2015). The tape with sections was laid on silicon wafers  
444 (University Wafer, Boston, MA), and then coated with carbon.

445 The sections were mapped and imaged as described previously (Terasaki et al.,  
446 2013) using a field-emission scanning electron microscope (Zeiss Sigma FE-SEM) in  
447 backscatter mode (8 keV), at a resolution of 3.5-6 nm/pixel (12,000 x 12,000 pixels), and  
448 the Atlas-4 Imaging software (Fibics, Ottawa, Ontario, Canada) in conjunction with  
449 custom scripts. Some sections were additionally imaged with a Verios 460L field-  
450 emission scanning electron microscope (FEI, Raleigh, NC). These were taken by the  
451 backscatter detector (5 keV) using immersion mode, at a resolution of 3-10 nm/pixel.

452 For TEM imaging, blocks that had already been cut for SEM serial sections were  
453 re-trimmed into a ~1 mm x 1 mm face, and 4-6 60 nm serial sections were collected as  
454 ribbons on formvar-coated slot grids. Sections were additionally post-stained with 3%  
455 aqueous uranyl acetate for 5 minutes, and dried at room temperature. Grids were  
456 imaged with a Hitachi H-7650 transmission electron microscope (Hitachi, Tarrytown,  
457 NY).

458 FIJI Image J was used for the image analysis. The alignment was done using the  
459 Linear Stack Alignment with SIFT plugin. The segmentations were done in the  
460 TrackEM2 module (Cardona et al., 2012) using area lists, and the measurements of  
461 cytoplasmic projections were done in the same module using treelines. The  
462 reconstructions were rendered in Adobe Photoshop CS6-Extended (Adobe, San Jose,  
463 CA).

464

### 465 **Acknowledgements**

466

467 We thank Arthur Hand and Maya Yankova for providing training and suggestions on  
468 processing and sectioning samples for EM, Richard Schalek and Jeff Lichtman for  
469 advice and continuous support on serial section EM, Ninna Shuhaibar for helping with  
470 segmentations, and Rindy Jaffe, Rachael Norris, and Mayu Inaba for thoughtful  
471 discussions and critical review of the manuscript. This work was supported by a grant  
472 from the Connecticut Science Fund.

473

474

### 475 **References**

476

477 Anderson, E., Albertini, D.F., 1976. Gap junctions between the oocyte and companion  
478 follicle cells in the mammalian ovary. *The Journal of Cell Biology* 71, 680–686.  
479 <https://doi.org/10.1083/jcb.71.2.680>

480 Bentley, D., Toroian-Raymond, A., 1986. Disoriented pathfinding by pioneer neurone  
481 growth cones deprived of filopodia by cytochalasin treatment. *Nature* 323,  
482 323712a0. <https://doi.org/10.1038/323712a0>

483 Bortolussi, M., Marini, G., Reolon, M.L., 1979. A histochemical study of the binding of  
484 125I-HCG to the rat ovary throughout the estrous cycle. *Cell Tissue Res.* 197,  
485 213–226.

- 486 Cardona, A., Saalfeld, S., Schindelin, J., Arganda-Carreras, I., Preibisch, S., Longair, M.,  
487 Tomancak, P., Hartenstein, V., Douglas, R.J., 2012. TrakEM2 Software for  
488 Neural Circuit Reconstruction. PLOS ONE 7, e38011.  
489 <https://doi.org/10.1371/journal.pone.0038011>
- 490 Clarke, H.J., 2018. Regulation of germ cell development by intercellular signaling in the  
491 mammalian ovarian follicle. WIREs Dev Biol 7, n/a-n/a.  
492 <https://doi.org/10.1002/wdev.294>
- 493 Danilchik, M., Williams, M., Brown, E., 2013. Blastocoel-spanning filopodia in cleavage-  
494 stage *Xenopus laevis*: Potential roles in morphogen distribution and detection.  
495 Dev. Biol. 382, 70–81. <https://doi.org/10.1016/j.ydbio.2013.07.024>
- 496 Denk, W., Horstmann, H., 2004. Serial Block-Face Scanning Electron Microscopy to  
497 Reconstruct Three-Dimensional Tissue Nanostructure. PLoS Biol 2.  
498 <https://doi.org/10.1371/journal.pbio.0020329>
- 499 Dong, J., Albertini, D.F., Nishimori, K., Kumar, T.R., Lu, N., Matzuk, M.M., 1996. Growth  
500 differentiation factor-9 is required during early ovarian folliculogenesis. Nature  
501 383, 531–535. <https://doi.org/10.1038/383531a0>
- 502 Edson, M.A., Nagaraja, A.K., Matzuk, M.M., 2009. The mammalian ovary from genesis  
503 to revelation. Endocr. Rev. 30, 624–712. <https://doi.org/10.1210/er.2009-0012>
- 504 El-Hayek, S., Yang, Q., Abbassi, L., FitzHarris, G., Clarke, H.J., 2018. Mammalian  
505 Oocytes Locally Remodel Follicular Architecture to Provide the Foundation for  
506 Germline-Soma Communication. Curr. Biol. 28, 1124–1131.e3.  
507 <https://doi.org/10.1016/j.cub.2018.02.039>
- 508 Elvin, J.A., Clark, A.T., Wang, P., Wolfman, N.M., Matzuk, M.M., 1999. Paracrine  
509 Actions Of Growth Differentiation Factor-9 in the Mammalian Ovary. Mol  
510 Endocrinol 13, 1035–1048. <https://doi.org/10.1210/mend.13.6.0310>
- 511 Fantin, A., Lampropoulou, A., Gestri, G., Raimondi, C., Senatore, V., Zachary, I.,  
512 Ruhrberg, C., 2015. NRP1 Regulates CDC42 Activation to Promote Filopodia  
513 Formation in Endothelial Tip Cells. Cell Rep 11, 1577–1590.  
514 <https://doi.org/10.1016/j.celrep.2015.05.018>
- 515 Gilula, N.B., Epstein, M.L., Beers, W.H., 1978. Cell-to-cell communication and ovulation.  
516 A study of the cumulus-oocyte complex. The Journal of Cell Biology 78, 58–75.  
517 <https://doi.org/10.1083/jcb.78.1.58>
- 518 González-Méndez, L., Seijo-Barandiarán, I., Guerrero, I., 2017. Cytoneme-mediated  
519 cell-cell contacts for Hedgehog reception. Elife 6.  
520 <https://doi.org/10.7554/eLife.24045>
- 521 Hawkins, S.M., Matzuk, M.M., 2008. Menstrual Cycle: Basic Biology. Ann N Y Acad Sci  
522 1135, 10–18. <https://doi.org/10.1196/annals.1429.018>
- 523 Heimsath, E.G., Yim, Y.-I., Mustapha, M., Hammer, J.A., Cheney, R.E., 2017. Myosin-X  
524 knockout is semi-lethal and demonstrates that myosin-X functions in neural tube  
525 closure, pigmentation, hyaloid vasculature regression, and filopodia formation.  
526 Sci Rep 7. <https://doi.org/10.1038/s41598-017-17638-x>
- 527 Hirshfield, A.N., 1991. Development of follicles in the mammalian ovary. Int. Rev. Cytol.  
528 124, 43–101.
- 529 Inaba, M., Buszczak, M., Yamashita, Y.M., 2015. Nanotubes mediate niche-stem cell  
530 signaling in the *Drosophila* testis. Nature 523, 329–332.  
531 <https://doi.org/10.1038/nature14602>
- 532 Kasthuri, N., Hayworth, K.J., Berger, D.R., Schalek, R.L., Conchello, J.A., Knowles-  
533 Barley, S., Lee, D., Vázquez-Reina, A., Kaynig, V., Jones, T.R., Roberts, M.,  
534 Morgan, J.L., Tapia, J.C., Seung, H.S., Roncal, W.G., Vogelstein, J.T., Burns, R.,

- 535 Sussman, D.L., Priebe, C.E., Pfister, H., Lichtman, J.W., 2015. Saturated  
536 Reconstruction of a Volume of Neocortex. *Cell* 162, 648–661.  
537 <https://doi.org/10.1016/j.cell.2015.06.054>
- 538 Kawase, E., Wong, M.D., Ding, B.C., Xie, T., 2004. Gbb/Bmp signaling is essential for  
539 maintaining germline stem cells and for repressing bam transcription in the  
540 *Drosophila* testis. *Development* 131, 1365–1375.  
541 <https://doi.org/10.1242/dev.01025>
- 542 Knobil, E., 1974. On the control of gonadotropin secretion in the rhesus monkey. *Recent*  
543 *Prog. Horm. Res.* 30, 1–46.
- 544 Kornberg, T.B., 2017. Distributing signaling proteins in space and time: the province of  
545 cytonemes. *Curr. Opin. Genet. Dev.* 45, 22–27.  
546 <https://doi.org/10.1016/j.gde.2017.02.010>
- 547 Li, R., Albertini, D.F., 2013. The road to maturation: somatic cell interaction and self-  
548 organization of the mammalian oocyte. *Nature Reviews. Molecular Cell Biology*;  
549 London 14, 141–52. <http://dx.doi.org/10.1038/nrm3531>
- 550 Lipner, H., Cross, N.L., 1968. Morphology of the membrana granulosa of the ovarian  
551 follicle. *Endocrinology* 82, 638–641. <https://doi.org/10.1210/endo-82-3-638>
- 552 Liu, X., Xie, F., Zamah, A.M., Cao, B., Conti, M., 2014. Multiple pathways mediate  
553 luteinizing hormone regulation of cGMP signaling in the mouse ovarian follicle.  
554 *Biol. Reprod.* 91, 9. <https://doi.org/10.1095/biolreprod.113.116814>
- 555 Miller, J., Fraser, S.E., McClay, D., 1995. Dynamics of thin filopodia during sea urchin  
556 gastrulation. *Development* 121, 2501–2511.
- 557 Mora, J.M., Fenwick, M.A., Castle, L., Baithun, M., Ryder, T.A., Mobberley, M.,  
558 Carzaniga, R., Franks, S., Hardy, K., 2012. Characterization and Significance of  
559 Adhesion and Junction-Related Proteins in Mouse Ovarian Follicles. *Biol Reprod*  
560 86. <https://doi.org/10.1095/biolreprod.111.096156>
- 561 Motta, P.M., Makabe, S., Naguro, T., Correr, S., 1994. Oocyte Follicle Cells Association  
562 during Development of Human Ovarian Follicle. A Study by High Resolution  
563 Scanning and Transmission Electron Microscopy. *Archives of Histology and*  
564 *Cytology* 57, 369–394. <https://doi.org/10.1679/aohc.57.369>
- 565 Niessen, C.M., Gottardi, C.J., 2008. Molecular components of the adherens junction.  
566 *Biochimica et Biophysica Acta (BBA) - Biomembranes, Apical Junctional*  
567 *Complexes Part I* 1778, 562–571. <https://doi.org/10.1016/j.bbamem.2007.12.015>
- 568 Norris, R.P., Baena, V., Terasaki, M., 2017. Localization of phosphorylated connexin 43  
569 by serial section immunogold electron microscopy. *J Cell Sci jcs.198408*.  
570 <https://doi.org/10.1242/jcs.198408>
- 571 Norris, R.P., Ratzan, W.J., Freudzon, M., Mehlmann, L.M., Krall, J., Movsesian, M.A.,  
572 Wang, H., Ke, H., Nikolaev, V.O., Jaffe, L.A., 2009. Cyclic GMP from the  
573 surrounding somatic cells regulates cyclic AMP and meiosis in the mouse oocyte.  
574 *Development* 136, 1869–1878. <https://doi.org/10.1242/dev.035238>
- 575 Ramírez-Weber, F.A., Kornberg, T.B., 1999. Cytonemes: cellular processes that project  
576 to the principal signaling center in *Drosophila* imaginal discs. *Cell* 97, 599–607.
- 577 Richards, J.S., Pangas, S.A., 2010. The ovary: basic biology and clinical implications. *J.*  
578 *Clin. Invest.* 120, 963–972. <https://doi.org/10.1172/JCI41350>
- 579 Roy, S., Huang, H., Liu, S., Kornberg, T.B., 2014. Cytoneme-mediated contact-  
580 dependent transport of the *Drosophila* Decapentaplegic signaling protein.  
581 *Science* 343, 1244624. <https://doi.org/10.1126/science.1244624>
- 582 Runge, K.E., Evans, J.E., He, Z.-Y., Gupta, S., McDonald, K.L., Stahlberg, H., Primakoff,  
583 P., Myles, D.G., 2007. Oocyte CD9 is enriched on the microvillar membrane and

584 required for normal microvillar shape and distribution. *Developmental Biology*  
585 304, 317–325. <https://doi.org/10.1016/j.ydbio.2006.12.041>  
586 Sanders, T.A., Llagostera, E., Barna, M., 2013. Specialized filopodia direct long-range  
587 transport of SHH during vertebrate tissue patterning. *Nature* 497, 628–632.  
588 <https://doi.org/10.1038/nature12157>  
589 Shuhaibar, L.C., Egbert, J.R., Norris, R.P., Lampe, P.D., Nikolaev, V.O., Thunemann,  
590 M., Wen, L., Feil, R., Jaffe, L.A., 2015. Intercellular signaling via cyclic GMP  
591 diffusion through gap junctions restarts meiosis in mouse ovarian follicles. *Proc*  
592 *Natl Acad Sci U S A* 112, 5527–5532. <https://doi.org/10.1073/pnas.1423598112>  
593 Simon, A.M., Goodenough, D.A., Li, E., Paul, D.L., 1997. Female infertility in mice  
594 lacking connexin 37. *Nature*; London 385, 525–9.  
595 <http://dx.doi.org/10.1038/385525a0>  
596 Simon, A.M., Hwudaurw Chen, Jackson, C.L., 2006. Cx37 and Cx43 Localize to Zona  
597 Pellucida in Mouse Ovarian Follicles. *Cell Communication & Adhesion* 13, 61–77.  
598 <https://doi.org/10.1080/15419060600631748>  
599 Su, Y.-Q., Wu, X., O'Brien, M.J., Pendola, F.L., Denegre, J.N., Matzuk, M.M., Eppig,  
600 J.J., 2004. Synergistic roles of BMP15 and GDF9 in the development and  
601 function of the oocyte-cumulus cell complex in mice: genetic evidence for an  
602 oocyte-granulosa cell regulatory loop. *Dev. Biol.* 276, 64–73.  
603 <https://doi.org/10.1016/j.ydbio.2004.08.020>  
604 Sugiura, K., Pendola, F.L., Eppig, J.J., 2005. Oocyte control of metabolic cooperativity  
605 between oocytes and companion granulosa cells: energy metabolism. *Dev. Biol.*  
606 279, 20–30. <https://doi.org/10.1016/j.ydbio.2004.11.027>  
607 Sun, R.Z., Lei, L., Cheng, L., Jin, Z.F., Zu, S.J., Shan, Z.Y., Wang, Z.D., Zhang, J.X.,  
608 Liu, Z.H., 2010. Expression of GDF-9, BMP-15 and their receptors in mammalian  
609 ovary follicles. *J. Mol. Histol.* 41, 325–332. [https://doi.org/10.1007/s10735-010-](https://doi.org/10.1007/s10735-010-9294-2)  
610 9294-2  
611 Terasaki, M., Shemesh, T., Kasthuri, N., Klemm, R.W., Schalek, R., Hayworth, K.J.,  
612 Hand, A.R., Yankova, M., Huber, G., Lichtman, J.W., Rapoport, T.A., Kozlov,  
613 M.M., 2013. Stacked Endoplasmic Reticulum Sheets Are Connected by  
614 Helicoidal Membrane Motifs. *Cell* 154, 285–296.  
615 <https://doi.org/10.1016/j.cell.2013.06.031>  
616 Ziv, N.E., Smith, S.J., 1996. Evidence for a role of dendritic filopodia in synaptogenesis  
617 and spine formation. *Neuron* 17, 91–102.  
618  
619  
620  
621  
622  
623  
624  
625  
626  
627  
628  
629  
630  
631  
632

633  
634  
635  
636  
637  
638  
639  
640  
641  
642  
643  
644  
645  
646  
647  
648

**Figure 1. Cumulus cells send numerous projections through the zona pellucida.**

**(A)** Schematic of a mouse antral follicle. Black square represents area magnified in **(A')**. **(A')** Schematic of several cumulus cells that send transzonal projections (TZPs) through the zona pellucida to connect to the oocyte. Cumulus cell bodies could be adjacent to or displaced from the zona pellucida. **(B)** SEM image of a cross-section through cumulus cells, zona pellucida (ZP), and oocyte of an antral follicle. Video 1 shows 202 serial sections of this area and highlights a cumulus cell with all of its projections. Scale bar, 5  $\mu\text{m}$ . **(B')** High-magnification of a region in the zona pellucida showing several TZPs in cross-section imaged by SEM. Scale bar, 1  $\mu\text{m}$ . **(C)** Reconstruction of every TZP sent by three neighboring cumulus cells, each shown in a different color. TZPs were segmented from 405 serial electron micrographs, encompassing a volume of 22.5 x 6.7 x 18.2  $\mu\text{m}$  (x, y, z). ZP, zona pellucida.

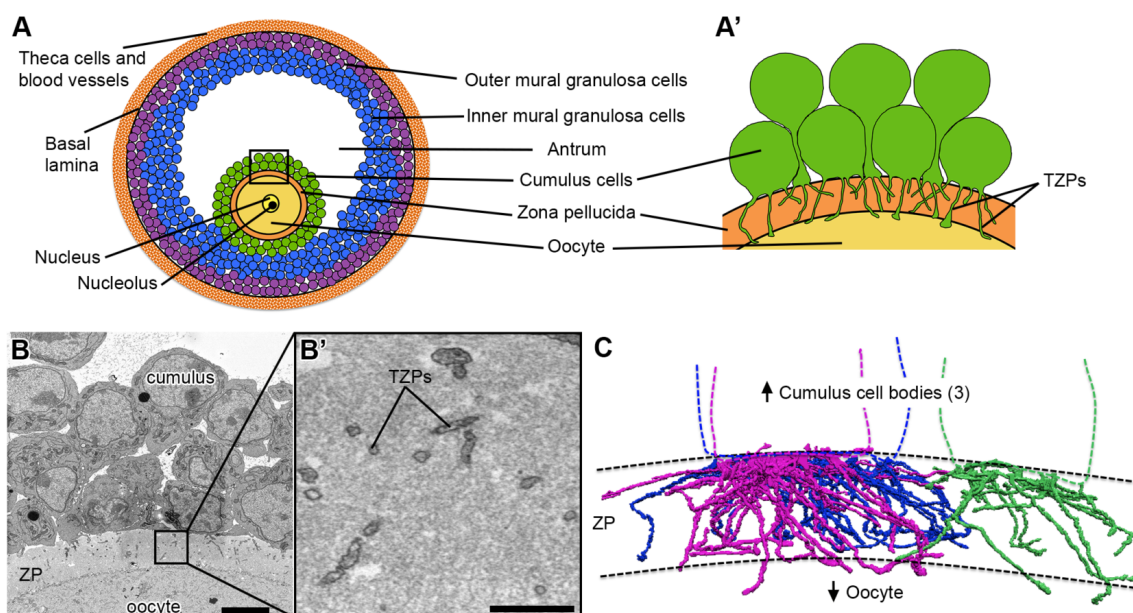

649  
650  
651  
652  
653  
654  
655  
656  
657  
658  
659  
660  
661  
662  
663  
664

665  
666  
667  
668  
669  
670  
671  
672  
673  
674  
675  
676  
677  
678  
679

**Figure 2. TZPs can be free-ended or connect to the oocyte. (A)** Serial section SEM images of a free-ended TZP. The TZP (arrow) ends on section 4 without making contact with the oocyte or another TZP. Scale bar, 500 nm. **(B)** A series of SEM images showing every other section of a TZP that connects to the oocyte. Black triangles indicate the TZP-oocyte site of contact. Scale bar, 500 nm. **(C)** Treelines representing every TZP sent by one cumulus cell. Free-ended TZPs are shown in blue, and connected TZPs are shown in red. **(D)** Average number of TZPs per cumulus cell. TZP types were divided into free-ended (blue) and connected (red). 8 cumulus cells from 2 different follicles were analyzed. Total number of projections was 316. Average is shown as mean  $\pm$  standard error of the mean. **(E)** Histogram of the length of free-ended (blue) and connected (red) TZPs from the data in D. An example of a remarkably long connected TZP can be seen in Video 3.

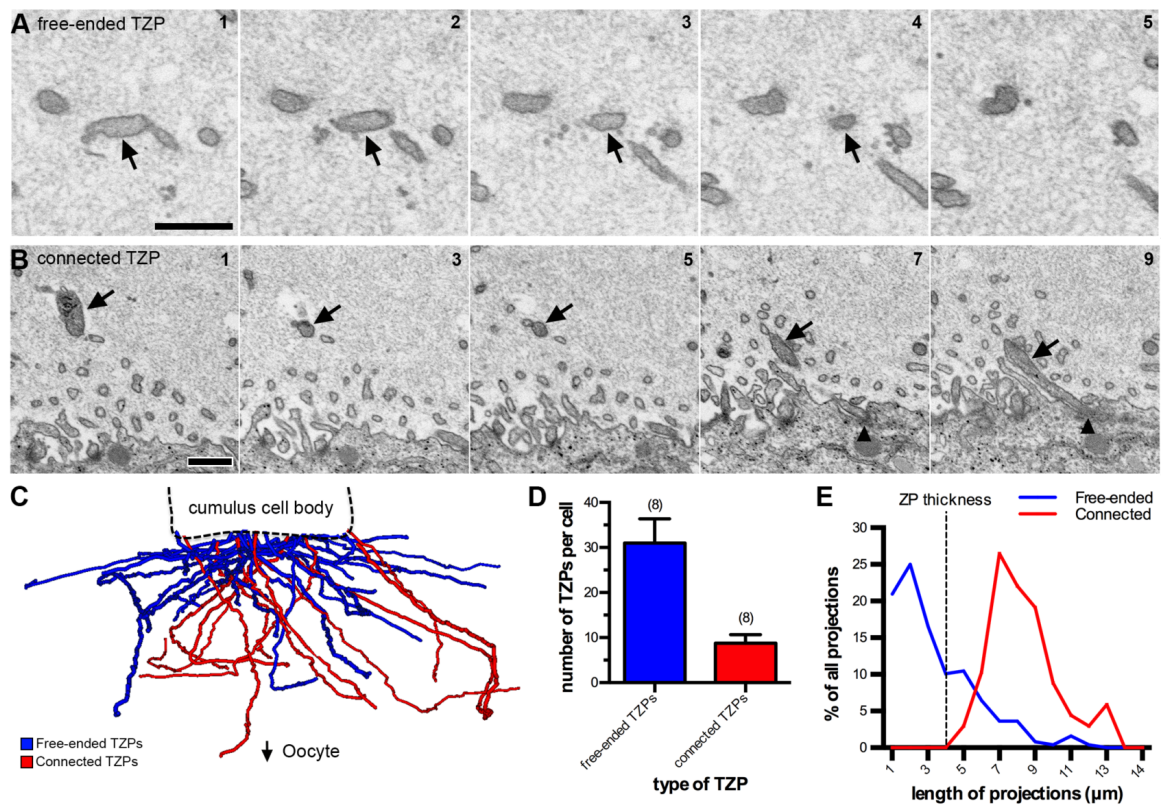

680  
681  
682  
683  
684  
685  
686  
687  
688  
689  
690  
691

692

693

694 **Figure 3. TZPs often contact and make gap junctions with each other. (A)** Serial

695 section SEM images of two TZPs that contact each other. Scale bar, 250 nm. Video 4

696 shows three additional examples of contact sites between TZPs. **(B)** Reconstruction

697 of two TZPs derived from different cells that contact each other (black triangle). Asterisks

698 represent branching points on the TZPs (see Supplementary Figure 2). Reconstruction

699 is  $4.2 \times 4.2 \times 5.7 \mu\text{m}$  (x, y, z), spanning through 126 serial sections (each, 45 nm-thick).

700 Yellow represents the oocyte membrane at the TZP-oocyte junction. **(C)** TEM image of a

701 contact site in the zona pellucida showing a gap junction (high-magnification insert). CC,

702 cumulus cell. ZP, zona pellucida. Scale bar, 500 nm.

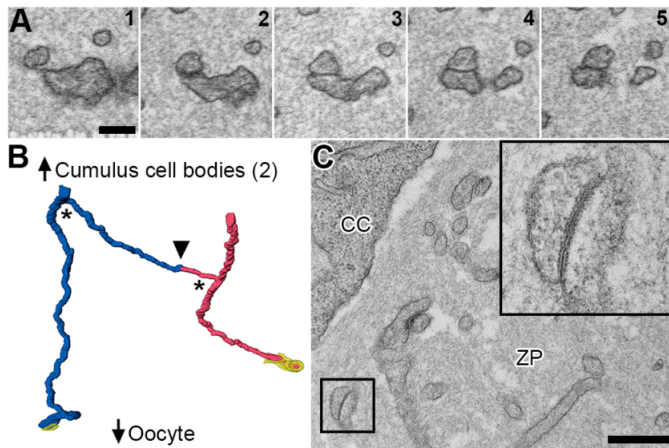

703

704

705

706

707

708

709

710

711

712

713

714

715

716

717

718

719

720

721

722

723

724

725

726

727

728



729 **Fig. 4. Contacts between TZPs and oocyte components. (A)** TEM image of TZPs  
730 that make adherens junctions with the oocyte surface. Adherens junctions are identified  
731 by an electron-dense region at the site of TZP-oocyte contact (black triangles). Mv,  
732 oocyte microvilli. Scale bar 500 nm. **(B)** Serial section SEM images of a TZP (black  
733 arrow) that makes an adherens junction with the oocyte surface. Oo, oocyte. Scale bar,  
734 300 nm. **(C)** Reconstruction of an adherens junction made by the TZP shown in B.  
735 Reconstruction is  $2.0 \times 1.1 \times 1.7 \mu\text{m}$  (x, y, z), spanning through 38 serial sections (each,  
736 45 nm-thick). Light yellow: oocyte surface. Purple: oocyte microvilli. Red: TZP. Bright  
737 yellow: adherens junction. a) TZP and all oocyte microvilli in the volume. b) Unattached  
738 microvilli have been removed from the reconstruction to show only those that make a  
739 contact with the TZP. c) All microvilli have been removed from the reconstruction. d) TZP  
740 has been removed from the reconstruction to show the adherens junction on the oocyte  
741 surface. **(D)** SEM image of an area of the zona pellucida in which TZPs and microvilli  
742 appear clumped (squares). High-magnification subpanels show the TZP in red and  
743 oocyte microvilli in purple (confirmed by serial sections). Scale bars,  $2 \mu\text{m}$  on low  
744 magnification, and 500 nm on high magnification subpanels. Video 5 shows this in serial  
745 sections (reconstructed in Figure 4F). **(E)** Side and top views of a reconstruction of an  
746 area in the zona pellucida that is  $3.4 \times 1.8 \times 2.8 \mu\text{m}$  (x, y, z), spanning through 63 serial  
747 sections (each, 45 nm-thick), showing two areas where TZPs (red) are seen clumped  
748 with microvilli from the oocyte (purple). Non-interacting microvilli are shown in gray. **(F)**  
749 Reconstruction of a single TZP (red), and oocyte microvilli that tightly contact it (purple).  
750 The reconstruction is  $2.9 \times 1.2 \times 2.7 \mu\text{m}$  (x, y, z), spanning through 61 serial sections  
751 (each, 45 nm-thick). This reconstruction was segmented from the data seen in Video 5.  
752

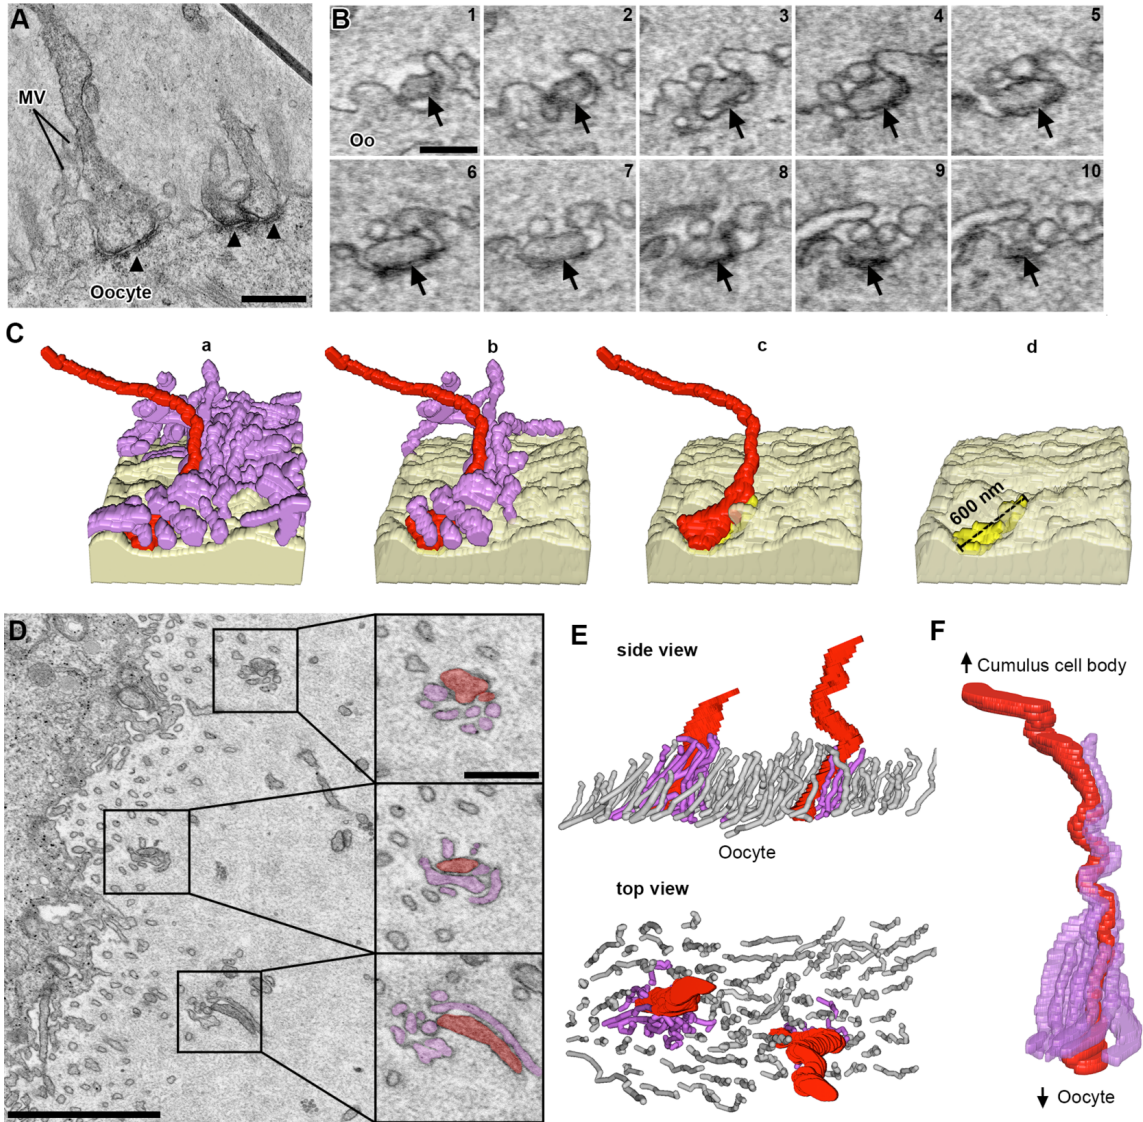

753  
754  
755  
756  
757  
758  
759  
760  
761  
762  
763  
764  
765  
766  
767  
768  
769

770 **Figure 5. Directionality of cumulus cell projections.** (A) SEM image showing multiple  
771 cumulus cell bodies, zona pellucida, and part of the oocyte in cross-section. Five cells  
772 (colored) were chosen for reconstruction. Scale bar, 5  $\mu\text{m}$ . Video 1 shows 202 serial  
773 sections of this area and highlights the green cell and all of its projections. (A') High-  
774 magnification SEM image of the zona pellucida showing TZPs in cross-section. The  
775 colored TZPs originated from the cumulus cells chosen for reconstruction in A. Scale  
776 bar, 2  $\mu\text{m}$ . (B) Reconstruction of 5 cumulus cell bodies from (A) and every cytoplasmic  
777 projection derived from them. Reconstruction is 28.4 x 24.6 x 18.2  $\mu\text{m}$  (x, y, z),  
778 encompassing 405 serial sections (each, 45 nm-thick). A rotating view of this  
779 reconstruction can be seen in Video 2. (C-D) Front and side views of reconstructed  
780 cumulus cells found directly adjacent to the zona pellucida (C), or displaced by 1-2 cell  
781 diameters (D).  
782

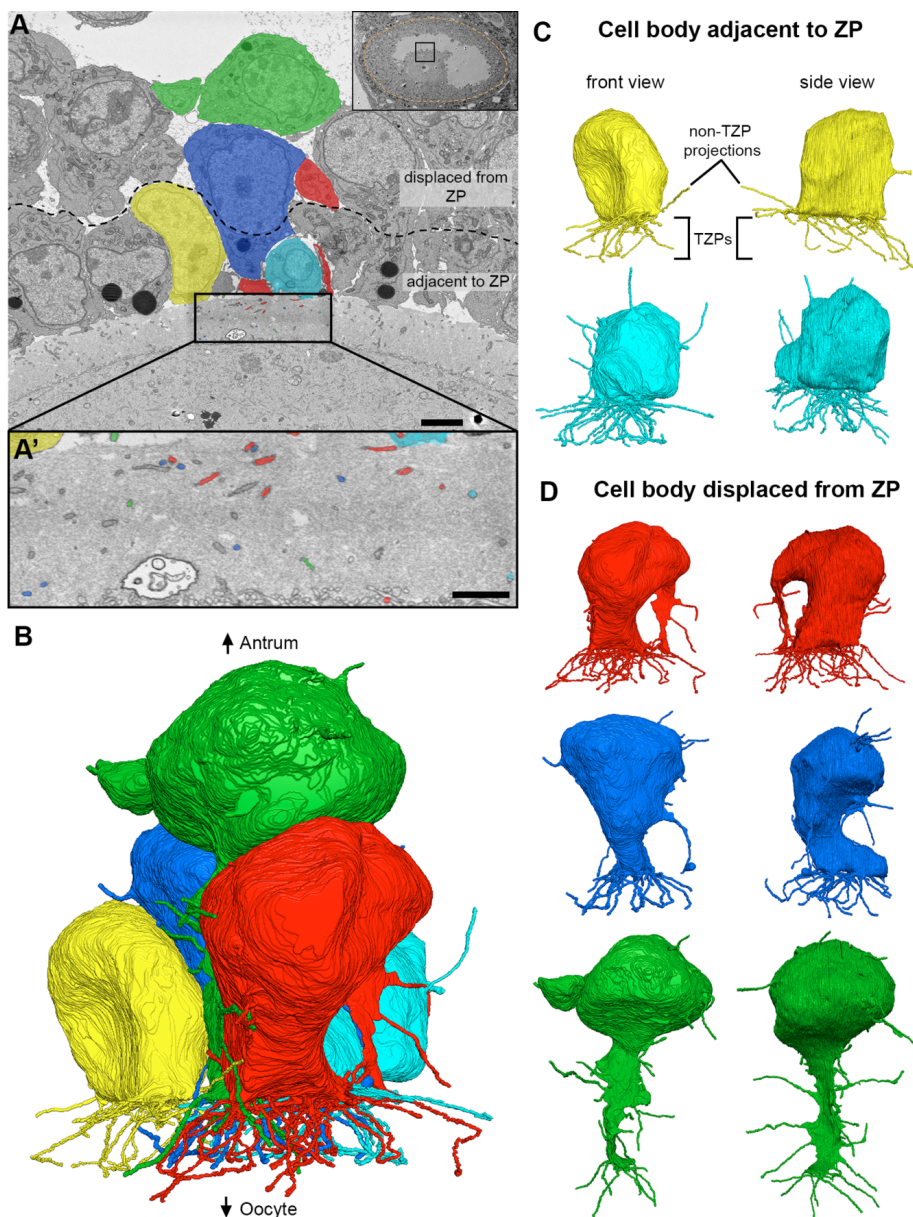

783

784 **Figure 6. Inner mural granulosa cells send projections in many directions. (A)** SEM  
785 image showing multiple inner mural granulosa cell bodies in cross-section. Four cells  
786 (colored) were chosen for reconstruction. Scale bar, 5  $\mu\text{m}$ . Video 6 shows 240 serial  
787 sections of these cells and their projections. **(B)** Reconstruction of 4 inner mural  
788 granulosa cell bodies from (A) and every cytoplasmic projection derived from them.  
789 Reconstruction is 21.2 x 16.4 x 20.8  $\mu\text{m}$  (x, y, z), encompassing 462 serial sections  
790 (each, 45 nm-thick). A rotating view of this reconstruction can be seen in video 7. **(C)**  
791 Front and side views of individual inner mural granulosa cell reconstructions from (B).  
792

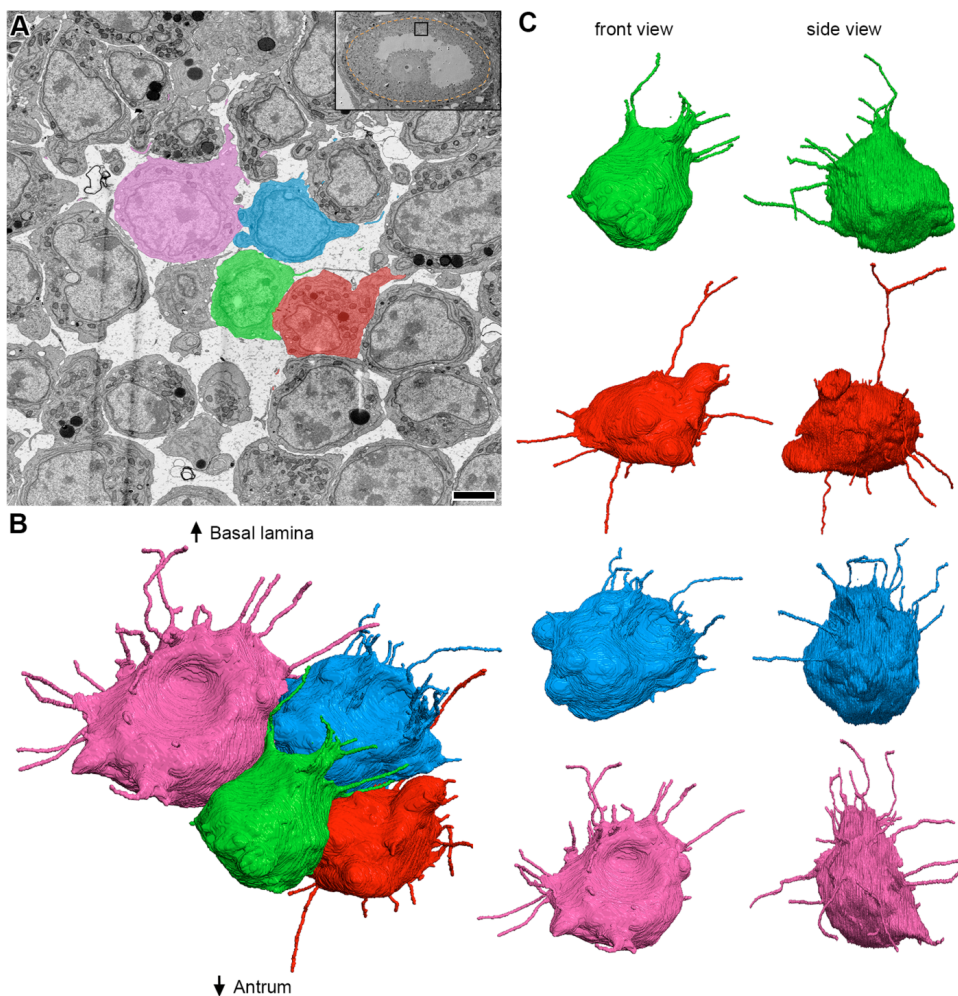

793  
794  
795  
796  
797  
798  
799  
800  
801  
802  
803  
804

805 **Figure 7. Outer mural granulosa cells send projections in many directions. (A)**  
806 SEM image showing a region of inner and outer mural granulosa cells, the basal lamina,  
807 and theca cells and blood vessels found outside of the follicle. Four outer mural  
808 granulosa cells were chosen for reconstruction (three colored; one cell was not in the  
809 plane of the section). Scale bar, 5  $\mu\text{m}$ . Video 8 shows 267 serial sections of this area.  
810 High-magnification insert shows parts of the cell bodies from outer mural granulosa cells  
811 on the bottom half and cell processes from theca or endothelial cells on the upper half.  
812 The basal lamina (BL) separates these cell types. Scale bar, 500 nm. **(B)** Reconstruction  
813 of 4 outer mural granulosa cell bodies and every cytoplasmic projection derived from  
814 them. Reconstruction is 16.4 x 14.7 x 22.4  $\mu\text{m}$  (x, y, z), encompassing 497 serial  
815 sections (each, 45 nm-thick). A rotating view of this reconstruction can be seen in video  
816 9. **(C-D)** Front and side views of reconstructed outer mural cells from (B), which were  
817 located directly adjacent to the basal lamina (C) or 1-2 cell diameters away from it (D).  
818

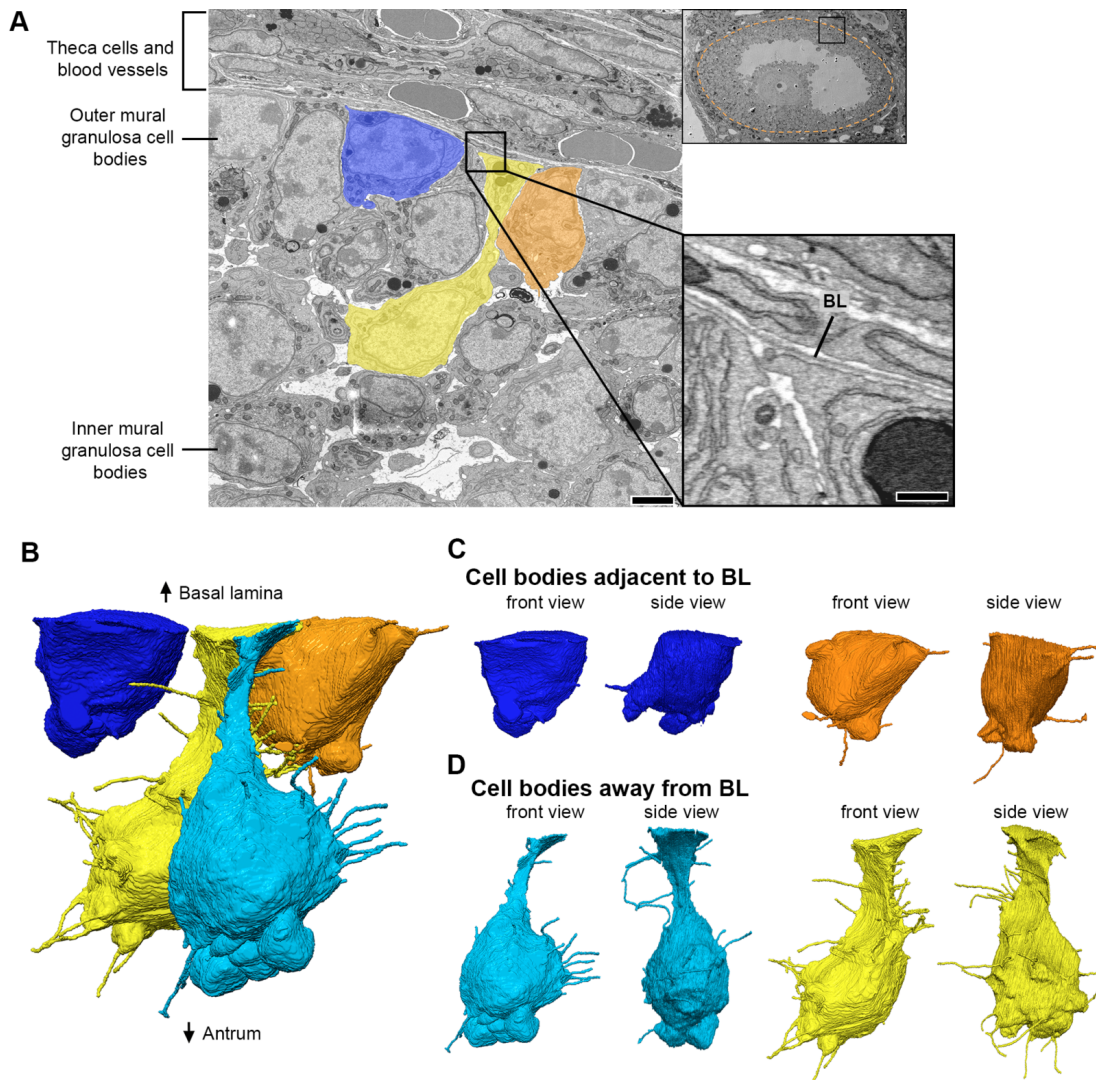

819  
820  
821  
822

823 **Figure 8. Summary of cytoplasmic projections in somatic cells of antral ovarian**  
824 **follicles. (A)** Summary table describing the number of projections per cell in each region  
825 of the ovarian follicle. Outer mural adjacent to BL refers to cells found directly adjacent to  
826 the basal lamina ( $n = 3$ ). Outer mural displaced from BL refers to cells found two-to-three  
827 cell diameters away from the basal lamina but that still connect to it through a thick  
828 cytoplasmic process ( $n = 4$ ). Inner mural refers to cells not connected to the oocyte or to  
829 the basal lamina ( $n = 14$ ). Cumulus displaced from ZP refers to cells found two-to-three  
830 cell diameters away from the zona pellucida but that still connect to the oocyte through  
831 TZPs ( $n = 3$ ). Cumulus adjacent to ZP refers to cells found directly adjacent to the zona  
832 pellucida ( $n = 5$ ). Numbers are shown as mean  $\pm$  standard error of the mean. To the left  
833 of the table are representative reconstructions of one cell from each of the cell groups in  
834 the table. Follicle insert is colored to represent the different cell groups. **(B)** Distribution  
835 of the length of projections from each group. All cumulus cells, regardless of the position  
836 of their cell body, were pooled together for the groups free-ended TZPs, connected  
837 TZPs, and cumulus non-TZPs. Outer mural granulosa cells were also pooled together.  
838 **(C)** Length of projections from every cell group represented as quartiles. Lower and  
839 upper edges of the box represent the first and third quartiles, respectively (25<sup>th</sup> and 75<sup>th</sup>  
840 percentiles). The line in the middle of the box represents the median (50<sup>th</sup> percentile).  
841 The lower and upper limits of the “whiskers” represent the minimum and maximum  
842 values, respectively. Cell groups are divided as described in (A). Gray-shaded region  
843 represents the thickness of the zona pellucida ( $\sim 4.1 \mu\text{m}$ ). Note that  $\sim 25\%$  of all of the  
844 projections from each cell type are longer than the width of the zona pellucida (suggesting  
845 they could contact the oocyte if the cell body is at an appropriate distance).  
846

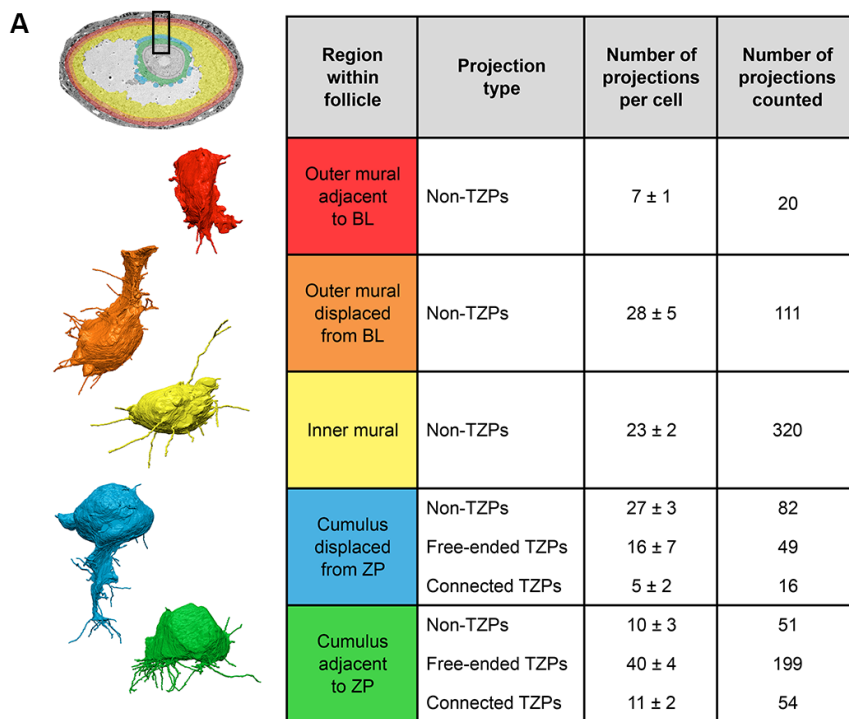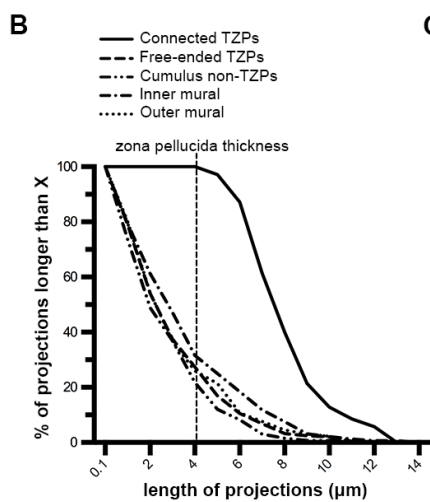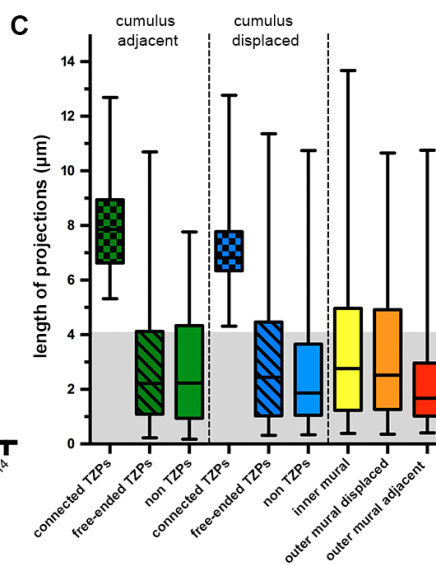

847  
 848  
 849  
 850  
 851  
 852  
 853  
 854  
 855  
 856  
 857  
 858

859 **Figure 9. Proposed model.** Differentiation of somatic cells in the ovarian follicle is  
860 dependent on contact with the oocyte or with the basal lamina. Here, a granulosa cell  
861 becomes a cumulus cell (green) if it contacts the oocyte through TZPs and receives the  
862 GDF9 signal from the oocyte. If a granulosa cell makes contact with the basal lamina, it  
863 becomes an outer mural granulosa cell (purple). Conversely, if a granulosa cell does not  
864 make contact with the oocyte or with the basal lamina, it remains as an inner mural  
865 granulosa cell (blue), the default phenotype.  
866

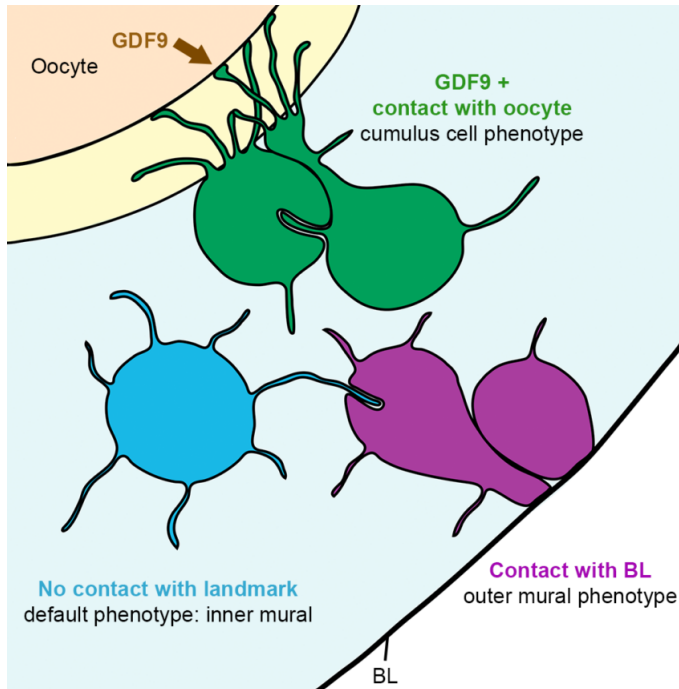

867  
868  
869  
870  
871  
872  
873  
874  
875  
876  
877  
878  
879  
880  
881  
882  
883  
884  
885  
886  
887  
888



889 **Supplementary Figure 1. Mitotic cumulus cells have connected and free-ended**  
890 **TZPs.** Mitotic cumulus cells were identified by the presence of condensed chromatin and  
891 the absence of a nuclear envelope. TZPs derived from this cell were reconstructed from  
892 serial sections and then overlaid on the micrograph (orange).  
893

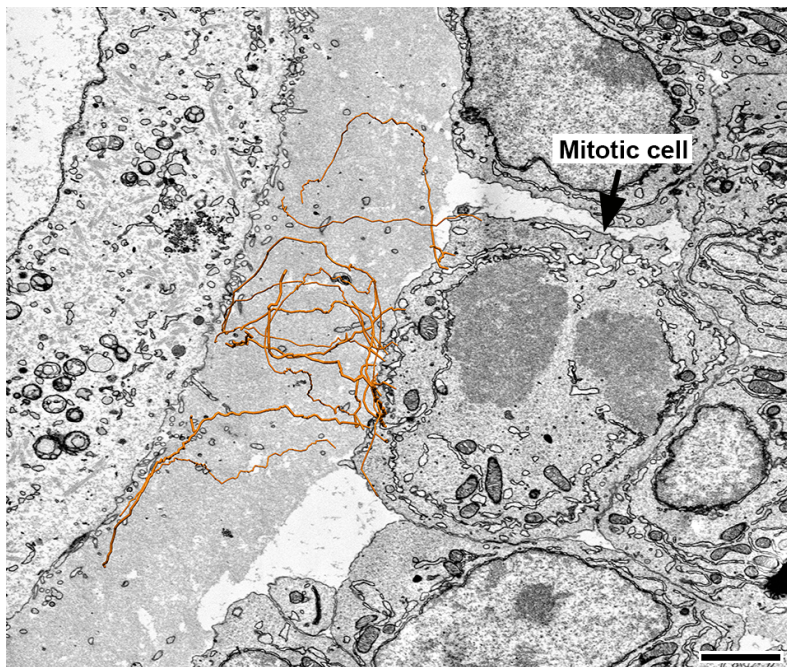

894  
895  
896  
897  
898  
899  
900  
901  
902  
903  
904  
905  
906  
907  
908  
909  
910  
911  
912  
913  
914  
915  
916  
917  
918

919 **Supplementary Figure 2. TZP branching.** A TZP branches into two projections. An  
920 asterisk labels the original TZP. Two black arrows label each of the TZP branches.  
921 Figure 3B shows a reconstruction of TZPs in which two branching points can be seen.  
922

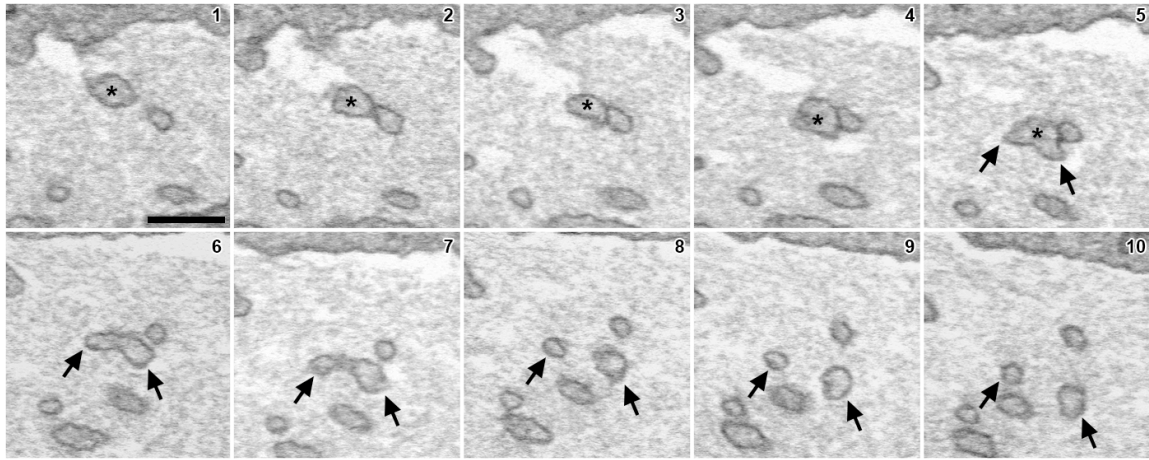

923  
924  
925  
926  
927  
928  
929  
930  
931  
932  
933  
934  
935  
936  
937  
938  
939  
940  
941  
942  
943  
944  
945  
946  
947  
948  
949  
950  
951  
952  
953  
954

955 **Supplementary Figure 3. TZPs make invaginated junctions with cumulus cell**  
956 **bodies.** Black arrow labels a TZP that invaginates the cell body of a cumulus cell. Based  
957 on comparison with our previous study, this is most likely an invaginated gap junction  
958 (Norris et al., 2017).  
959

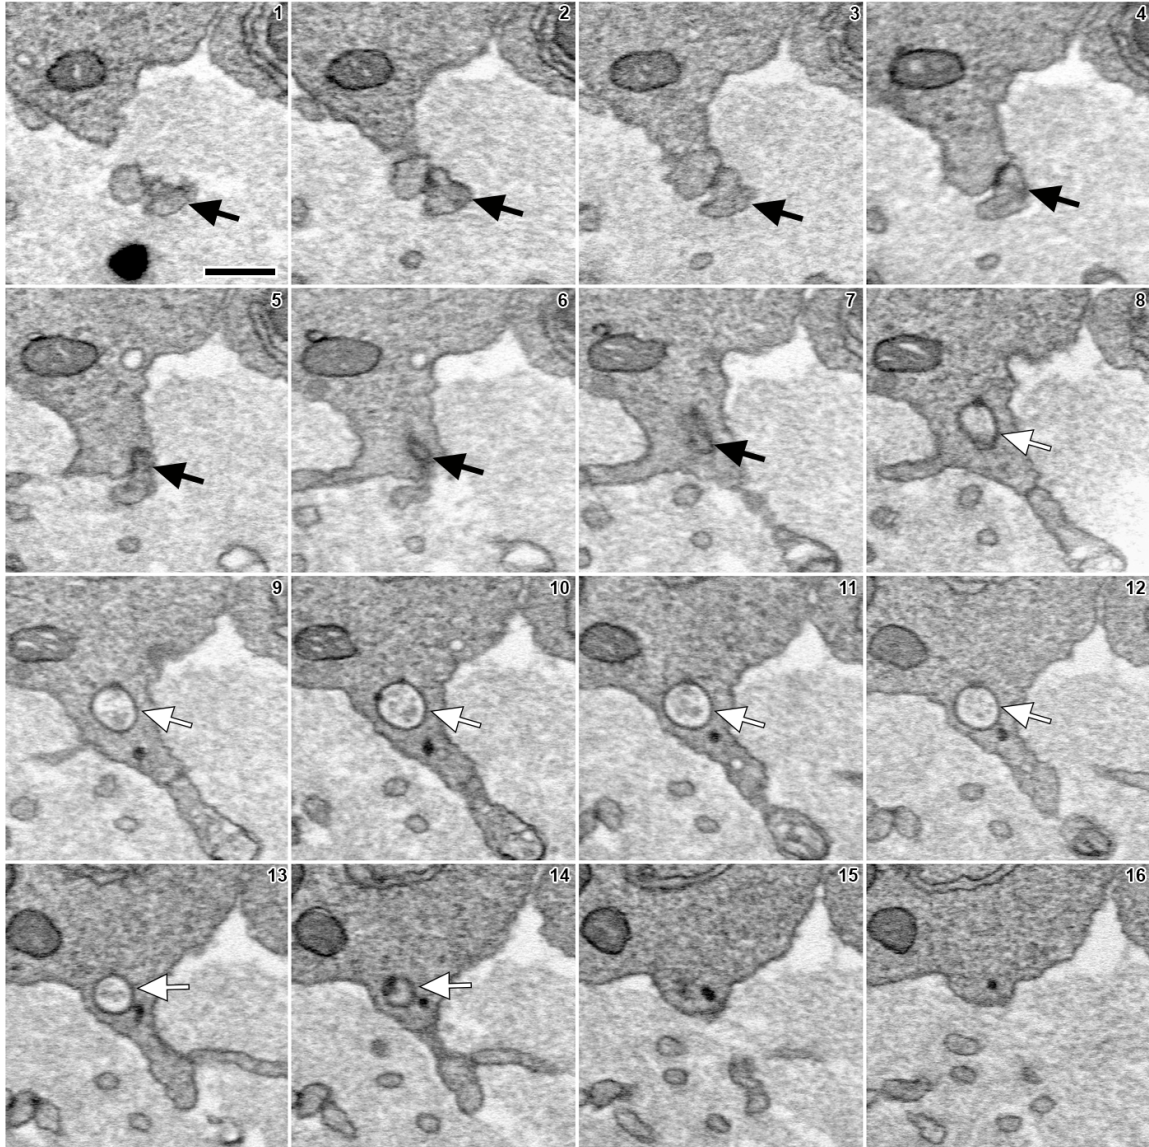

960  
961  
962  
963  
964  
965  
966  
967  
968  
969  
970  
971

972 **Figure legends for supplementary videos**

973

974 **Video 1. Projections can be derived from cumulus cells not directly adjacent to the**  
975 **zona pellucida.** 202 serial section SEM images highlighting a cumulus cell that is  
976 displaced from the zona pellucida. Connected and free-ended TZPs originate from the  
977 cell process at the edge of the zona pellucida. Additionally, several cytoplasmic  
978 projections originate from the elongated shaft of the cell and travel in many directions. All  
979 cytoplasmic projections originating from this cell body are labeled in green. Same cell  
980 shown in Figure 5D (green).

981

982 **Video 2. Reconstruction of 5 cumulus cell bodies and every cytoplasmic**  
983 **projection derived from them.** Reconstruction is 28.4 x 24.6 x 18.2  $\mu\text{m}$  (x, y, z),  
984 encompassing 405 serial sections (each, 45 nm-thick). The oocyte and the zona  
985 pellucida are located at the bottom. Same reconstruction as Figure 5B.

986

987 **Video 3. A connected TZP makes a long looping junction with the oocyte surface.**  
988 Serial section SEM images through the zona pellucida of an antral follicle. Cumulus cell  
989 bodies are shown on top, and the oocyte surface is shown on bottom. Asterisk labels a  
990 connected TZP that makes a long junction with the oocyte surface and then loops back  
991 into the zona pellucida.

992

993 **Video 4. TZPs make contact sites with each other.** Serial electron micrographs  
994 showing three examples of contact sites between TZPs. Each contact site is labeled with  
995 a differently colored arrow. Most of these contacts were found to be gap junctions by  
996 TEM (see Figure 3C).

997

998 **Video 5. Oocyte microvilli closely associate with connected TZPs (serial sections).**  
999 Red arrow labels a TZP that eventually connects to the oocyte surface. Yellow arrow  
1000 labels a long microvillus from the oocyte that associates with the TZP for a long  
1001 distance. The TZP gets surrounded by more microvilli (intermittent yellow arrows) as it  
1002 gets closer to the oocyte surface. A reconstruction of these structures can be seen in  
1003 Figure 4F.

1004

1005 **Video 6. Inner mural granulosa cells send projections in many directions (serial**  
1006 **sections).** 240 serial section SEM images of inner mural granulosa cells. Four cells  
1007 (same as those in figure 6) are labeled with different colors. Cytoplasmic projections  
1008 derived from each cell are labeled with the same color as their respective cell body.  
1009 Several long projections that extend for several cell diameters can be seen originating  
1010 from every cell. Notice multiple projections that originate from the blue cell and  
1011 invaginate extensively into a neighboring cell located to its upper right. A rotating  
1012 reconstruction of these cells can be seen in video 7.

1013

1014 **Video 7. Inner mural granulosa cells send projections in many directions**  
1015 **(reconstruction).** Reconstruction of 4 inner mural granulosa cell bodies and every  
1016 cytoplasmic projection derived from them. Reconstruction is 21.2 x 16.4 x 20.8  $\mu\text{m}$  (x, y,  
1017 z), encompassing 462 serial sections (each, 45 nm-thick). Same cells shown in Figure 6  
1018 and Video 6.

1019

1020 **Video 8. Outer mural granulosa cells send projections in many directions (serial**  
1021 **sections).** 267 serial section SEM images of outer mural granulosa cells. Four cells  
1022 (same as those in figure 7) are labeled with different colors. Cytoplasmic projections  
1023 derived from each cell are labeled with the same color as their respective cell body. The  
1024 basal lamina is shown at the top and cell processes from theca and endothelial cells are  
1025 seen on the opposite side of it (see Figure 7A). Notice that the yellow and light blue cells  
1026 connect to the basal lamina through a long thick cytoplasmic process. Thin cytoplasmic  
1027 projections can be seen originating from the cell bodies and the thick cytoplasmic  
1028 process. Numerous invaginating projections originate from the yellow cell towards a  
1029 neighboring cell to its right. A rotating reconstruction of these cells can be seen in video  
1030 9.

1031  
1032 **Video 9. Outer mural granulosa cells send projections in many directions**  
1033 **(reconstruction).** Reconstruction of 4 outer mural granulosa cell bodies and every  
1034 cytoplasmic projection derived from them. Basal lamina is located at the top. Notice that  
1035 the further away the cell body is from the basal lamina, the more projections it  
1036 possesses. Reconstruction is 16.4 x 14.7 x 22.4  $\mu\text{m}$  (x, y, z), encompassing 497 serial  
1037 sections (each, 45 nm-thick). Same cells shown in Figure 7 and Video 8.

1038  
1039 **Video 10. Non-TZP cytoplasmic projections often invaginate into neighboring**  
1040 **cells.** Red arrow labels a cytoplasmic projection derived from a cumulus cell, which  
1041 invaginates into a neighboring cumulus cell. Notice the space between the invaginated  
1042 projection and the plasma membrane of the cell into which it invaginates. We have not  
1043 detected fused membranes at the invaginations. This type of ending is seen in 24% of all  
1044 non-TZP cytoplasmic projections of every cell type.
